# Supplementary material
Source: PubMed Central journal article supplement (PMC7033725)
Supplement: jexbio-223-212548-s1.pdf [file jexbio-223-212548-s1.pdf]

**Supplementary Material to accompany article:** Ren, C.C., Sylvia, K.E., Munley, K.M., Deyoe, J.E., Henderson, S.G., Vu, M.P, and Demas, G.E. Photoperiod Modulates the Gut Microbiome and Aggressive Behavior in Siberian Hamsters.

**Table S1. Effect of photoperiodic treatment and time on behavior of male hamsters.**

| Behavior                           | P-value for Treatment x Time Interaction | LD              |                 |                 | SD-R            |                 |                 | SD-NR           |                  |                  |
|------------------------------------|------------------------------------------|-----------------|-----------------|-----------------|-----------------|-----------------|-----------------|-----------------|------------------|------------------|
|                                    |                                          | Week 3          | Week 6          | Week 9          | Week 3          | Week 6          | Week 9          | Week 3          | Week 6           | Week 9           |
| Frequency of Attack                | 0.174                                    | 11.33<br>±3.23  | 8.00<br>±1.93   | 4.78<br>±1.39   | 9.22<br>±2.22   | 8.56<br>±1.94   | 15.11<br>±3.91  | 16.25<br>±5.61  | 6.25<br>±2.14    | 7.50<br>±3.44    |
| Duration of Attack (s)             | 0.144                                    | 26.40<br>±9.78  | 21.77<br>±6.65  | 10.63<br>±3.49  | 17.71<br>±4.32  | 24.09<br>±8.06  | 21.67<br>±4.74  | 41.40<br>±15.28 | 16.64<br>±9.91   | 10.63<br>±5.46   |
| Frequency of Chasing               | 0.340                                    | 0.00<br>±0.00   | 0.11<br>±0.11   | 0.00<br>±0.00   | 0.11<br>±0.11   | 0.11<br>±0.11   | 0.44<br>±0.24   | 0.00<br>±0.00   | 0.25<br>±0.25    | 0.00<br>±0.00    |
| Duration of Chasing (s)            | 0.605                                    | 0.00<br>±0.00   | 0.07<br>±0.07   | 0.00<br>±0.00   | 0.31<br>±0.31   | 0.16<br>±0.16   | 0.18<br>±0.09   | 0.00<br>±0.00   | 0.66<br>±0.66    | 0.00<br>±0.00    |
| Latency to First Attack (s)        | 0.097                                    | 68.44<br>±31.21 | 92.56<br>±32.31 | 81.11<br>±35.72 | 80.22<br>±34.44 | 94.89<br>±36.22 | 75.11<br>±22.20 | 56.63<br>±13.78 | 165.63<br>±42.41 | 123.00<br>±34.56 |
| Duration of Head Neck Sniffing (s) | <b>&lt;0.0001</b>                        | 26.22<br>±9.40  | 25.94<br>±8.70  | 20.91<br>±7.00  | 22.01<br>±6.31  | 18.02<br>±5.07  | 20.91<br>±7.00  | 18.48<br>±4.87  | 24.38<br>±5.08   | 14.00<br>±4.45   |
| Frequency of Head Neck Sniffing    | <b>0.001</b>                             | 13.11<br>±3.74  | 15.89<br>±4.45  | 12.78<br>±3.85  | 11.67<br>±2.94  | 9.00<br>±1.88   | 7.71<br>±4.06   | 10.50<br>±2.64  | 15.00<br>±2.44   | 9.50<br>±2.40    |
| Frequency of Scent Marking         | 0.066                                    | 0.56<br>±0.44   | 0.78<br>±0.66   | 1.33<br>±0.99   | 2.11<br>±0.90   | 1.11<br>±0.99   | 3.11<br>±1.84   | 2.11<br>±0.90   | 1.11<br>±0.99    | 0.25<br>±0.25    |
| Frequency of Grooming              | 0.406                                    | 6.33<br>±0.83   | 9.67<br>±2.23   | 9.67<br>±2.40   | 9.44<br>±1.73   | 9.33<br>±1.64   | 10.56<br>±1.44  | 9.25<br>±1.98   | 8.38<br>±1.38    | 10.56<br>±2.01   |
| Duration of Grooming (s)           | 0.821                                    | 10.42<br>±2.01  | 20.01<br>±6.95  | 13.93<br>±6.60  | 24.50<br>±7.16  | 23.62<br>±6.98  | 27.88<br>±8.49  | 20.18<br>±11.35 | 16.95<br>±5.18   | 12.03<br>±2.93   |

Aggressive and non-aggressive social behaviors in long day males (LD), short day males that were responsive to changes in photoperiod (SD-R), and short-day males that were not responsive to changes in photoperiod (SD-NR) following 3, 6, or 9 weeks of treatment. Group means are presented as mean±s.e.m. (LD:  $N=9$ , SD-R:  $N=9$ , SD-NR:  $N=8$ ).  $P$ -values are shown for treatment x time interactions, and boldface font indicates a significant treatment x time interaction ( $P<0.05$ , mixed model ANOVAs).

**Table S2. Effect of photoperiod treatment and time on behavior of female hamsters.**

| Behavior                           | <i>P</i> -value for Treatment x Time Interaction | LD              |                 |                 | SD-R            |                 |                 | SD-NR           |                 |                  |
|------------------------------------|--------------------------------------------------|-----------------|-----------------|-----------------|-----------------|-----------------|-----------------|-----------------|-----------------|------------------|
|                                    |                                                  | Week 3          | Week 6          | Week 9          | Week 3          | Week 6          | Week 9          | Week 3          | Week 6          | Week 9           |
| Frequency of Attack                | <b>0.004</b>                                     | 5.00<br>±1.41   | 6.78<br>±2.10   | 6.44<br>±1.86   | 7.11<br>±2.10   | 6.33<br>±1.26   | 10.00<br>±2.63  | 2.28<br>±0.94   | 3.50<br>±1.32   | 4.75<br>±1.29    |
| Duration of Attack (s)             | <b>0.003</b>                                     | 9.74<br>±3.32   | 12.34<br>±4.48  | 8.47<br>±2.63   | 7.27<br>±2.18   | 12.80<br>±2.72  | 22.66<br>±6.33  | 2.80<br>±1.05   | 4.60<br>±1.57   | 8.25<br>±2.86    |
| Frequency of Chasing               | 0.638                                            | 0.11<br>±0.11   | 0.00<br>±0.00   | 0.00<br>±0.00   | 0.11<br>±0.11   | 0.11<br>±0.11   | 0.00<br>±0.00   | 0.25<br>±0.25   | 0.00<br>±0.00   | 0.00<br>±0.00    |
| Duration of Chasing (s)            | 0.944                                            | 0.06<br>±0.06   | 0.00<br>±0.00   | 0.00<br>±0.00   | 0.18<br>±0.18   | 0.11<br>±0.11   | 0.00<br>±0.00   | 0.21<br>±0.21   | 0.00<br>±0.00   | 0.00<br>±0.00    |
| Latency to First Attack            | 0.273                                            | 31.33<br>±11.83 | 62.89<br>±27.53 | 72.56<br>±31.31 | 46.22<br>±14.31 | 47.22<br>±15.34 | 41.67<br>±21.26 | 62.75<br>±29.26 | 86.50<br>±33.99 | 114.75<br>±40.33 |
| Duration of Head Neck Sniffing (s) | <b>&lt;0.0001</b>                                | 13.36<br>±3.57  | 15.03<br>±5.41  | 11.24<br>±1.98  | 13.00<br>±4.34  | 15.27<br>±5.39  | 10.36<br>±3.53  | 14.51<br>±6.12  | 14.09<br>±3.73  | 23.91<br>±4.13   |
| Frequency of Head Neck Sniffing    | <b>0.001</b>                                     | 9.44<br>±2.17   | 9.67<br>±2.04   | 8.56<br>±1.21   | 7.44<br>±2.40   | 9.22<br>±2.72   | 7.78<br>±2.28   | 9.25<br>±3.27   | 8.75<br>±2.42   | 12.63<br>±2.25   |
| Frequency of Scent Marking         | 0.052                                            | 1.89<br>±1.32   | 2.33<br>±1.65   | 4.00<br>±2.66   | 0.00<br>±0.00   | 0.44<br>±0.24   | 0.89<br>±0.77   | 0.13<br>±0.13   | 0.00<br>±0.00   | 0.00<br>±0.00    |
| Frequency of Grooming              | 0.063                                            | 6.44<br>±1.83   | 3.89<br>±0.93   | 7.00<br>±1.99   | 7.22<br>±1.28   | 8.00<br>±2.10   | 10.67<br>±2.00  | 4.25<br>±1.58   | 4.50<br>±0.96   | 4.75<br>±1.16    |
| Duration of Grooming (s)           | <b>0.044</b>                                     | 7.96<br>±2.36   | 12.94<br>±7.65  | 15.63<br>±6.71  | 16.12<br>±7.52  | 18.38<br>±6.80  | 13.27<br>±3.08  | 4.26<br>±1.40   | 4.79<br>±1.00   | 5.80<br>±1.88    |

Aggressive and non-aggressive social behaviors in long day females (LD), short day females that were responsive to changes in photoperiod (SD-R), and short-day females that were not responsive to changes in photoperiod (SD-NR) following 3, 6, or 9 weeks of treatment. Group means are presented as mean±s.e.m. (LD: *N*=9, SD-R: *N*=9, SD-NR: *N*=8). *P*-values are shown for treatment x time interactions, and boldface font indicates a significant treatment x time interaction (*P*<0.05, mixed model ANOVAs).

**Table S3. Effect of photoperiodic treatment on the relative abundance of bacterial phyla and families in the gut microbiome of male hamsters.**

| Phylum or Family |                                 | P               | LD              |                 |                 | SD-R            |                 |                 | SD-NR           |                 |                 |
|------------------|---------------------------------|-----------------|-----------------|-----------------|-----------------|-----------------|-----------------|-----------------|-----------------|-----------------|-----------------|
|                  |                                 |                 | Week 3          | Week 6          | Week 9          | Week 3          | Week 6          | Week 9          | Week 3          | Week 6          | Week 9          |
| Phylum           | Actinobacteria                  | 0.904           | 0.004<br>±0.002 | 0.009<br>±0.003 | 0.006<br>±0.003 | 0.007<br>±0.003 | 0.007<br>±0.005 | 0.008<br>±0.003 | 0.006<br>±0.003 | 0.006<br>±0.003 | 0.007<br>±0.003 |
|                  | Bacteroidetes                   | <b>0.011</b>    | 1.053<br>±0.322 | 1.716<br>±0.361 | 2.328<br>±0.517 | 1.266<br>±0.197 | 1.806<br>±0.386 | 1.655<br>±0.310 | 0.932<br>±0.177 | 1.274<br>±0.221 | 2.344<br>±0.652 |
|                  | Deferribacteres                 | 0.344           | 0.022<br>±0.015 | 0.010<br>±0.009 | 0.009<br>±0.007 | 0.000<br>±0.000 | 0.001<br>±0.001 | 0.015<br>±0.009 | 0.000<br>±0.000 | 0.003<br>±0.003 | 0.009<br>±0.008 |
|                  | Elusimicrobia                   | 0.472           | 0.001<br>±0.001 | 0.012<br>±0.011 | 0.005<br>±0.004 | 0.002<br>±0.002 | 0.002<br>±0.002 | 0.011<br>±0.006 | 0.076<br>±0.073 | 0.041<br>±0.035 | 0.082<br>±0.070 |
|                  | Cyanobacteria                   | 0.228           | 0.054<br>±0.031 | 0.074<br>±0.022 | 0.106<br>±0.030 | 0.140<br>±0.049 | 0.123<br>±0.051 | 0.227<br>±0.069 | 0.092<br>±0.021 | 0.079<br>±0.015 | 0.159<br>±0.052 |
|                  | Epsilonbacteraeota              | 0.228           | 0.020<br>±0.004 | 0.018<br>±0.003 | 0.044<br>±0.005 | 0.056<br>±0.018 | 0.100<br>±0.056 | 0.056<br>±0.023 | 0.031<br>±0.008 | 0.035<br>±0.007 | 0.085<br>±0.047 |
|                  | Euryarchaeota                   | 0.730           | 0.008<br>±0.004 | 0.002<br>±0.001 | 0.009<br>±0.005 | 0.007<br>±0.006 | 0.006<br>±0.004 | 0.009<br>±0.004 | 0.002<br>±0.001 | 0.005<br>±0.004 | 0.028<br>±0.027 |
|                  | Firmicutes                      | 0.217           | 2.715<br>±0.723 | 2.502<br>±0.400 | 4.394<br>±1.078 | 2.642<br>±0.692 | 4.039<br>±1.298 | 5.080<br>±0.702 | 1.853<br>±0.261 | 4.000<br>±1.250 | 7.776<br>±4.534 |
|                  | Patescibacteria                 | <b>0.007</b>    | 0.023<br>±0.004 | 0.048<br>±0.014 | 0.050<br>±0.008 | 0.024<br>±0.005 | 0.034<br>±0.006 | 0.060<br>±0.019 | 0.028<br>±0.006 | 0.042<br>±0.012 | 0.073<br>±0.027 |
|                  | Proteobacteria                  | 0.448           | 0.135<br>±0.034 | 0.094<br>±0.017 | 0.187<br>±0.067 | 0.075<br>±0.023 | 0.110<br>±0.050 | 0.326<br>±0.164 | 0.080<br>±0.012 | 0.117<br>±0.045 | 0.289<br>±0.206 |
|                  | Spirochaetes                    | 0.175           | 0.017<br>±0.009 | 0.016<br>±0.002 | 0.075<br>±0.043 | 0.057<br>±0.051 | 0.066<br>±0.032 | 0.086<br>±0.051 | 0.011<br>±0.002 | 0.025<br>±0.004 | 0.267<br>±0.175 |
| Tenericutes      | 0.128                           | 0.084<br>±0.035 | 0.143<br>±0.054 | 0.128<br>±0.048 | 0.148<br>±0.093 | 0.128<br>±0.054 | 0.177<br>±0.066 | 0.046<br>±0.020 | 0.024<br>±0.005 | 0.045<br>±0.014 |                 |
| Family           | Marinifilaceae                  | <b>0.005</b>    | 0.028<br>±0.005 | 0.047<br>±0.009 | 0.062<br>±0.019 | 0.045<br>±0.009 | 0.065<br>±0.010 | 0.095<br>±0.031 | 0.026<br>±0.010 | 0.036<br>±0.013 | 0.062<br>±0.023 |
|                  | Muribaculaceae                  | <b>0.015</b>    | 0.809<br>±0.277 | 1.354<br>±0.308 | 1.674<br>±0.373 | 0.959<br>±0.210 | 1.454<br>±0.397 | 1.219<br>±0.250 | 0.930<br>±0.168 | 1.122<br>±0.317 | 1.747<br>±0.486 |
|                  | Ruminococcaceae                 | 0.075           | 0.459<br>±0.104 | 0.534<br>±0.095 | 0.984<br>±0.178 | 0.388<br>±0.070 | 0.779<br>±0.244 | 0.934<br>±0.205 | 0.450<br>±0.116 | 0.703<br>±0.160 | 1.817<br>±0.933 |
|                  | Saccharimonadaceae              | <b>0.008</b>    | 0.023<br>±0.004 | 0.048<br>±0.014 | 0.050<br>±0.008 | 0.024<br>±0.005 | 0.034<br>±0.006 | 0.060<br>±0.019 | 0.028<br>±0.006 | 0.042<br>±0.012 | 0.073<br>±0.027 |
|                  | Uncultured Mollicutes Bacterium | <b>0.045</b>    | 0.007<br>±0.004 | 0.033<br>±0.021 | 0.007<br>±0.004 | 0.000<br>±0.000 | 0.001<br>±0.001 | 0.000<br>±0.000 | 0.003<br>±0.003 | 0.000<br>±0.000 | 0.000<br>±0.000 |
|                  | Uncultured Bacterium            | 0.068           | 0.035<br>±0.015 | 0.047<br>±0.017 | 0.064<br>±0.022 | 0.182<br>±0.079 | 0.138<br>±0.059 | 0.208<br>±0.073 | 0.080<br>±0.030 | 0.052<br>±0.015 | 0.071<br>±0.020 |

|                        |                   |                 |                 |                 |                 |                 |                 |                 |                 |                 |
|------------------------|-------------------|-----------------|-----------------|-----------------|-----------------|-----------------|-----------------|-----------------|-----------------|-----------------|
| Other                  | <b>0.028</b>      | 0.068<br>±0.028 | 0.086<br>±0.037 | 0.131<br>±0.040 | 0.039<br>±0.009 | 0.031<br>±0.006 | 0.102<br>±0.057 | 0.046<br>±0.011 | 0.038<br>±0.013 | 0.090<br>±0.049 |
| Anaeroplasmataceae     | 0.087             | 0.024<br>±0.009 | 0.024<br>±0.028 | 0.031<br>±0.016 | 0.003<br>±0.003 | 0.003<br>±0.002 | 0.005<br>±0.005 | 0.033<br>±0.023 | 0.033<br>±0.034 | 0.069<br>±0.044 |
| Bacteroidaceae         | 0.058             | 0.013<br>±0.005 | 0.022<br>±0.006 | 0.015<br>±0.006 | 0.023<br>±0.013 | 0.020<br>±0.007 | 0.027<br>±0.014 | 0.011<br>±0.003 | 0.010<br>±0.004 | 0.023<br>±0.010 |
| BacteroidalesRF16group | 0.051             | 0.005<br>±0.002 | 0.006<br>±0.002 | 0.011<br>±0.005 | 0.011<br>±0.006 | 0.005<br>±0.002 | 0.009<br>±0.004 | 0.006<br>±0.002 | 0.006<br>±0.002 | 0.006<br>±0.001 |
| Desulfovibrionaceae    | 0.061             | 0.055<br>±0.023 | 0.036<br>±0.014 | 0.075<br>±0.044 | 0.014<br>±0.006 | 0.031<br>±0.016 | 0.140<br>±0.114 | 0.015<br>±0.006 | 0.030<br>±0.013 | 0.096<br>±0.049 |
| Lachnospiraceae        | <b>0.038</b>      | 2.193<br>±0.736 | 1.383<br>±0.211 | 3.160<br>±1.125 | 1.023<br>±0.164 | 3.008<br>±1.096 | 5.445<br>±3.516 | 1.663<br>±0.536 | 2.716<br>±1.070 | 3.458<br>±0.762 |
| Lactobacillaceae       | <b>0.030</b>      | 0.046<br>±0.031 | 0.050<br>±0.150 | 0.089<br>±0.034 | 0.069<br>±0.028 | 0.050<br>±0.014 | 0.062<br>±0.022 | 0.074<br>±0.048 | 0.089<br>±0.058 | 0.120<br>±0.064 |
| Marinifilaceae         | <b>&lt;0.0001</b> | 0.028<br>±0.005 | 0.047<br>±0.009 | 0.062<br>±0.019 | 0.026<br>±0.010 | 0.036<br>±0.013 | 0.062<br>±0.023 | 0.045<br>±0.009 | 0.065<br>±0.010 | 0.095<br>±0.031 |
| Muribaculaceae         | <b>0.0001</b>     | 0.809<br>±0.277 | 1.354<br>±0.308 | 1.674<br>±0.373 | 0.930<br>±0.168 | 1.122<br>±0.317 | 1.747<br>±0.486 | 0.959<br>±0.210 | 1.454<br>±0.397 | 1.219<br>±0.250 |
| Mycoplasmataceae       | 0.099             | 0.006<br>±0.002 | 0.005<br>±0.002 | 0.008<br>±0.002 | 0.009<br>±0.004 | 0.011<br>±0.004 | 0.150<br>±0.007 | 0.011<br>±0.003 | 0.020<br>±0.009 | 0.018<br>±0.004 |
| Paracaedibacteraceae   | <b>0.011</b>      | 0.015<br>±0.008 | 0.003<br>±0.001 | 0.034<br>±0.023 | 0.007<br>±0.004 | 0.018<br>±0.010 | 0.030<br>±0.015 | 0.004<br>±0.003 | 0.015<br>±0.010 | 0.042<br>±0.021 |
| Prevotellaceae         | <b>0.020</b>      | 0.126<br>±0.043 | 0.175<br>±0.050 | 0.406<br>±0.126 | 0.197<br>±0.038 | 0.188<br>±0.044 | 0.289<br>±0.124 | 0.137<br>±0.052 | 0.137<br>±0.044 | 0.159<br>±0.063 |
| Rikenellaceae          | <b>0.010</b>      | 0.059<br>±0.019 | 0.097<br>±0.027 | 0.131<br>±0.040 | 0.079<br>±0.030 | 0.093<br>±0.027 | 0.205<br>±0.132 | 0.097<br>±0.031 | 0.119<br>±0.025 | 0.137<br>±0.038 |
| Ruminococcaceae        | <b>0.005</b>      | 0.459<br>±0.104 | 0.534<br>±0.095 | 0.984<br>±0.178 | 0.450<br>±0.116 | 0.703<br>±0.160 | 1.817<br>±0.933 | 0.388<br>±0.070 | 0.779<br>±0.244 | 0.934<br>±0.205 |
| Saccharimonadaceae     | <b>&lt;0.0001</b> | 0.023<br>±0.004 | 0.048<br>±0.014 | 0.050<br>±0.008 | 0.028<br>±0.006 | 0.042<br>±0.012 | 0.073<br>±0.027 | 0.024<br>±0.005 | 0.034<br>±0.006 | 0.060<br>±0.019 |
| Spirochaetaceae        | <b>0.040</b>      | 0.014<br>±0.009 | 0.008<br>±0.002 | 0.066<br>±0.041 | 0.004<br>±0.002 | 0.017<br>±0.004 | 0.240<br>±0.154 | 0.055<br>±0.051 | 0.061<br>±0.033 | 0.080<br>±0.049 |
| Tannerellaceae         | <b>0.045</b>      | 0.003<br>±0.002 | 0.005<br>±0.002 | 0.004<br>±0.001 | 0.005<br>±0.001 | 0.004<br>±0.001 | 0.008<br>±0.001 | 0.003<br>±0.001 | 0.005<br>±0.002 | 0.046<br>±0.040 |
| Uncultured             | <b>0.043</b>      | 0.053<br>±0.013 | 0.034<br>±0.012 | 0.072<br>±0.015 | 0.047<br>±0.015 | 0.055<br>±0.014 | 0.112<br>±0.077 | 0.039<br>±0.015 | 0.056<br>±0.027 | 0.164<br>±0.083 |
| Veillonellaceae        | <b>0.021</b>      | 0.011<br>±0.004 | 0.007<br>±0.003 | 0.016<br>±0.006 | 0.006<br>±0.001 | 0.018<br>±0.007 | 0.025<br>±0.011 | 0.008<br>±0.004 | 0.013<br>±0.007 | 0.021<br>±0.008 |

Relative abundance of bacterial phyla and families in long day males (LD), short day males that were responsive to changes in photoperiod (SD-R), and short day males that were not responsive to changes in photoperiod (SD-NR) following 3, 6, or 9 weeks of treatment. Group means are presented as mean±s.e.m. (LD:  $N=6$ , SD-R:  $N=6$ , SD-NR:  $N=6$ ).  $P$ -values ( $P$ ) are shown for all treatment x time interactions in phyla and treatment, time, and treatment x time interactions in families with  $P<0.10$ . Boldface font indicates a significant  $P$ -value ( $P<0.05$ , mixed model ANOVAs).

**Table S4. Effect of photoperiodic treatment on the relative abundance of bacterial phyla and families in the gut microbiome of female hamsters.**

| Phylum or Family |                  | P                  | LD              |                 |                 | SD-R            |                 |                 | SD-NR           |                 |                 |                 |
|------------------|------------------|--------------------|-----------------|-----------------|-----------------|-----------------|-----------------|-----------------|-----------------|-----------------|-----------------|-----------------|
|                  |                  |                    | Week 3          | Week 6          | Week 9          | Week 3          | Week 6          | Week 9          | Week 3          | Week 6          | Week 9          |                 |
| Phylum           | Treatment x Time | Actinobacteria     | 0.424           | 0.001<br>±0.001 | 0.004<br>±0.002 | 0.009<br>±0.004 | 0.000<br>±0.000 | 0.003<br>±0.003 | 0.037<br>±0.032 | 0.002<br>±0.002 | 0.003<br>±0.001 | 0.011<br>±0.010 |
|                  |                  | Bacteroidetes      | 0.308           | 0.895<br>±0.302 | 1.155<br>±0.343 | 1.895<br>±0.329 | 0.956<br>±0.217 | 1.040<br>±0.324 | 8.701<br>±6.933 | 0.900<br>±0.184 | 1.169<br>±0.370 | 2.198<br>±0.441 |
|                  |                  | Deferribacteres    | 0.438           | 0.022<br>±0.019 | 0.021<br>±0.200 | 0.011<br>±0.008 | 0.000<br>±0.000 | 0.000<br>±0.000 | 0.002<br>±0.002 | 0.001<br>±0.001 | 0.015<br>±0.015 | 0.003<br>±0.003 |
|                  |                  | Elusimicrobia      | 0.441           | 0.006<br>±0.004 | 0.009<br>±0.005 | 0.016<br>±0.009 | 0.004<br>±0.004 | 0.001<br>±0.000 | 0.024<br>±0.018 | 0.007<br>±0.006 | 0.010<br>±0.008 | 0.005<br>±0.003 |
|                  |                  | Cyanobacteria      | 0.468           | 0.006<br>±0.003 | 0.004<br>±0.002 | 0.008<br>±0.006 | 0.003<br>±0.002 | 0.003<br>±0.002 | 0.004<br>±0.002 | 0.007<br>±0.003 | 0.006<br>±0.001 | 0.016<br>±0.009 |
|                  |                  | Epsilonbacteraeota | 0.351           | 0.030<br>±0.008 | 0.031<br>±0.013 | 0.042<br>±0.015 | 0.029<br>±0.012 | 0.024<br>±0.008 | 0.248<br>±0.203 | 0.030<br>±0.010 | 0.026<br>±0.006 | 0.066<br>±0.029 |
|                  |                  | Euryarchaeota      | 0.406           | 0.026<br>±0.009 | 0.018<br>±0.003 | 0.042<br>±0.018 | 0.029<br>±0.012 | 0.024<br>±0.008 | 0.248<br>±0.203 | 0.030<br>±0.010 | 0.026<br>±0.006 | 0.066<br>±0.029 |
|                  |                  | Firmicutes         | <b>0.036</b>    | 2.531<br>±0.803 | 2.862<br>±0.510 | 3.223<br>±1.042 | 2.262<br>±0.532 | 2.609<br>±0.752 | 9.429<br>±4.592 | 2.789<br>±0.719 | 3.930<br>±0.755 | 6.691<br>±1.900 |
|                  |                  | Patescibacteria    | 0.235           | 0.015<br>±0.002 | 0.033<br>±0.013 | 0.051<br>±0.006 | 0.026<br>±0.004 | 0.030<br>±0.008 | 0.243<br>±0.177 | 0.045<br>±0.018 | 0.040<br>±0.008 | 0.060<br>±0.010 |
|                  |                  | Proteobacteria     | 0.176           | 0.179<br>±0.054 | 0.310<br>±0.172 | 0.135<br>±0.057 | 0.178<br>±0.098 | 0.163<br>±0.048 | 0.634<br>±0.395 | 0.084<br>±0.026 | 0.133<br>±0.033 | 0.260<br>±0.126 |
|                  |                  | Spirochaetes       | 0.075           | 0.017<br>±0.005 | 0.015<br>±0.004 | 0.024<br>±0.003 | 0.012<br>±0.005 | 0.033<br>±0.019 | 0.104<br>±0.056 | 0.011<br>±0.005 | 0.017<br>±0.007 | 0.110<br>±0.067 |
| Tenericutes      | 0.511            | 0.052<br>±0.043    | 0.138<br>±0.111 | 0.095<br>±0.046 | 0.061<br>±0.025 | 0.050<br>±0.016 | 0.396<br>±0.336 | 0.092<br>±0.031 | 0.062<br>±0.021 | 0.126<br>±0.028 |                 |                 |
| Family           | Treatment x Time | Lachnospiraceae    | 0.071           | 1.970<br>±0.600 | 1.748<br>±0.433 | 2.133<br>±0.953 | 1.585<br>±0.446 | 1.791<br>±0.626 | 3.545<br>±1.444 | 2.045<br>±0.620 | 2.854<br>±0.697 | 4.546<br>±1.625 |
|                  |                  | Peptococcaceae     | 0.067           | 0.015<br>±0.002 | 0.033<br>±0.013 | 0.051<br>±0.006 | 0.026<br>±0.004 | 0.030<br>±0.008 | 0.243<br>±0.177 | 0.045<br>±0.018 | 0.040<br>±0.008 | 0.060<br>±0.010 |
|                  |                  | Ruminococcaceae    | <b>0.033</b>    | 0.470<br>±0.090 | 0.481<br>±0.092 | 0.717<br>±0.232 | 0.521<br>±0.120 | 0.582<br>±0.132 | 2.584<br>±1.442 | 0.551<br>±0.148 | 0.754<br>±0.129 | 1.724<br>±0.507 |
|                  |                  | Spirochaetaceae    | 0.081           | 0.018<br>±0.005 | 0.012<br>±0.004 | 0.019<br>±0.004 | 0.007<br>±0.004 | 0.031<br>±0.020 | 0.091<br>±0.046 | 0.010<br>±0.006 | 0.015<br>±0.007 | 0.095<br>±0.062 |
|                  | Time             | Anaeroplasmataceae | <b>0.007</b>    | 0.004<br>±0.004 | 0.002<br>±0.002 | 0.002<br>±0.002 | 0.039<br>±0.022 | 0.022<br>±0.009 | 0.020<br>±0.007 | 0.002<br>±0.001 | 0.005<br>±0.002 | 0.009<br>±0.008 |
|                  |                  | Other              | 0.065           | 0.033<br>±0.011 | 0.041<br>±0.007 | 0.074<br>±0.020 | 0.042<br>±0.016 | 0.021<br>±0.007 | 0.255<br>±0.204 | 0.019<br>±0.005 | 0.022<br>±0.004 | 0.080<br>±0.024 |
|                  |                  | Bacteroidaceae     | 0.081           | 0.019<br>±0.011 | 0.025<br>±0.010 | 0.028<br>±0.011 | 0.006<br>±0.002 | 0.007<br>±0.005 | 0.076<br>±0.062 | 0.018<br>±0.006 | 0.024<br>±0.016 | 0.039<br>±0.019 |

|                    |              |                 |                 |                 |                 |                 |                 |                 |                 |                 |
|--------------------|--------------|-----------------|-----------------|-----------------|-----------------|-----------------|-----------------|-----------------|-----------------|-----------------|
| Lachnospiraceae    | <b>0.009</b> | 1.970<br>±0.600 | 1.748<br>±0.433 | 2.133<br>±0.953 | 1.585<br>±0.446 | 1.791<br>±0.626 | 3.545<br>±1.444 | 2.045<br>±0.620 | 2.854<br>±0.697 | 4.546<br>±1.625 |
| Lactobacillaceae   | <b>0.002</b> | 0.032<br>±0.018 | 0.034<br>±0.020 | 0.103<br>±0.028 | 0.045<br>±0.028 | 0.020<br>±0.007 | 0.150<br>±0.094 | 0.049<br>±0.022 | 0.041<br>±0.018 | 0.148<br>±0.065 |
| Marinifilaceae     | 0.074        | 0.030<br>±0.007 | 0.071<br>±0.026 | 0.076<br>±0.035 | 0.042<br>±0.013 | 0.037<br>±0.015 | 0.093<br>±0.049 | 0.018<br>±0.010 | 0.023<br>±0.007 | 0.050<br>±0.027 |
| Peptococcaceae     | <b>0.006</b> | 0.011<br>±0.003 | 0.010<br>±0.004 | 0.011<br>±0.005 | 0.009<br>±0.002 | 0.012<br>±0.003 | 0.022<br>±0.009 | 0.009<br>±0.002 | 0.017<br>±0.003 | 0.026<br>±0.012 |
| Ruminococcaceae    | <b>0.003</b> | 0.470<br>±0.090 | 0.481<br>±0.092 | 0.717<br>±0.232 | 0.521<br>±0.120 | 0.582<br>±0.132 | 2.584<br>±1.442 | 0.551<br>±0.148 | 0.754<br>±0.129 | 1.724<br>±0.507 |
| Saccharimonadaceae | 0.092        | 0.015<br>±0.002 | 0.033<br>±0.013 | 0.051<br>±0.006 | 0.026<br>±0.004 | 0.030<br>±0.008 | 0.060<br>±0.177 | 0.044<br>±0.018 | 0.040<br>±0.008 | 0.060<br>±0.010 |
| Spirochaetaceae    | <b>0.008</b> | 0.018<br>±0.005 | 0.012<br>±0.004 | 0.019<br>±0.004 | 0.007<br>±0.004 | 0.031<br>±0.020 | 0.091<br>±0.046 | 0.010<br>±0.006 | 0.015<br>±0.007 | 0.095<br>±0.062 |

Relative abundance of bacterial phyla and families in long day females (LD), short day females that were responsive to changes in photoperiod (SD-R), and short day females that were not responsive to changes in photoperiod (SD-NR) following 3, 6, or 9 weeks of treatment. Group means are presented as mean±s.e.m. (LD:  $N=6$ , SD-R:  $N=6$ , SD-NR:  $N=6$ ).  $P$ -values ( $P$ ) are shown for all treatment x time interactions in phyla and treatment, time, and treatment x time interactions in families with  $P<0.10$ . Boldface font indicates a significant  $P$ -value ( $P<0.05$ , mixed model ANOVAs).

**Table S5. Serum DHEA levels of male and female hamsters following 9 weeks of treatment.**

| Sex    | <i>P</i> | Serum DHEA Concentration at Week 9 (ng mL <sup>-1</sup> ) |               |               |
|--------|----------|-----------------------------------------------------------|---------------|---------------|
|        |          | LD                                                        | SD-R          | SD-NR         |
| Male   | 0.692    | 3.637 ± 0.609                                             | 4.789 ± 1.052 | 4.402 ± 1.252 |
| Female | 0.463    | 2.419 ± 0.697                                             | 4.417 ± 1.257 | 3.393 ± 0.876 |

Serum dehydroepiandrosterone (DHEA) levels in long day males (LD), short day males that were responsive to changes in photoperiod (SD-R), short day males that were not responsive to changes in photoperiod (SD-NR), LD females, SD-R females, and SD-NR females following 9 weeks of treatment. Group means are presented as mean±s.e.m. (LD males: *N*=7, SD-R males: *N*=9, SD-NR males: *N*=5, LD females: *N*=8, SD-R females: *N*=8, SD-NR females: *N*=5). *P*-values (*P*) are shown for statistical comparisons across treatment groups for each sex (one-way ANOVAs).

**Table S6. Correlations between serum DHEA levels, the gut microbiome, and behavior of male and female hamsters.**

| Behavior or gut bacteria phylum or family |                    | Correlation coefficient with serum DHEA ( $r_s$ ) | <i>N</i> | <i>P</i>     |
|-------------------------------------------|--------------------|---------------------------------------------------|----------|--------------|
| Males                                     | Number of Attacks  | 0.796                                             | 14       | <b>0.001</b> |
|                                           | Attack Duration    | 0.733                                             | 14       | <b>0.003</b> |
|                                           | Patescibacteria    | 0.506                                             | 14       | 0.065        |
|                                           | Marinifilaceae     | 0.125                                             | 14       | 0.125        |
| Females                                   | Number of Attacks  | -0.120                                            | 13       | 0.697        |
|                                           | Attack Duration    | -0.115                                            | 13       | 0.710        |
|                                           | Anaeroplasmataceae | -0.011                                            | 13       | 0.971        |
|                                           | Firmicutes         | -0.187                                            | 13       | 0.541        |
|                                           | Ruminococcaceae    | -0.093                                            | 13       | 0.765        |

Correlations between serum dehydroepiandrosterone (DHEA) levels, the gut microbiome, and behavior in long day males (LD), short day males that were responsive to changes in photoperiod (SD-R), short day males that were not responsive to changes in photoperiod (SD-NR), LD females, SD-R females, and SD-NR females following 9 weeks of treatment. Correlations coefficients ( $r_s$ ), number of animals (*N*), and *P*-values (*P*) are shown for each analysis, which was performed across treatment groups (LD males: *N*=4, SD-R males: *N*=6, SD-NR males: *N*=4, LD females: *N*=5, SD-R females: *N*=5, SD-NR females: *N*=3). Boldface font indicates a significant *P*-value ( $P < 0.05$ , Spearman's rank correlations).
